# Supplementary material for: “Hot cross bun” is a potential imaging marker for the severity of cerebellar ataxia in MSA-C
Source: PubMed Central journal article supplement (PMC7884406; doi:10.1038/s41531-021-00159-w), 2021-02-15
Supplement: 41531_2021_159_MOESM1_ESM.pdf [file 41531_2021_159_MOESM1_ESM.pdf]

**Supplementary Table 1. Inter- and intra- rater reliability of the HCBs grade evaluation**

| Variable   | Inter-rater reliability |           |           |         |         |               | Intra-rater reliability |           |         |         |               |
|------------|-------------------------|-----------|-----------|---------|---------|---------------|-------------------------|-----------|---------|---------|---------------|
|            | Rater A                 | Rater B   | Rater C   | Z value | P-value | Fleiss' kappa | Rating 1                | Rating 2  | Z value | P-value | Cohen's Kappa |
|            | Grade/N/N               | Grade/N/N | Grade/N/N |         |         |               | Grade/N/N               | Grade/N/N |         |         |               |
| HCBs Grade | 1 (13/81)               | 1 (15/81) | 1 (13/81) | 23      | P<0.001 | 0.750         | 1 (11/90)               | 1 (11/90) | 14.9    | P<0.001 | 0.815         |
|            | 2 (20/81)               | 2 (16/81) | 2 (18/81) |         |         |               | 2 (26/90)               | 2 (24/90) |         |         |               |
|            | 3 (16/81)               | 3 (20/81) | 3 (18/81) |         |         |               | 3 (17/90)               | 3 (19/90) |         |         |               |
|            | 4 (21/81)               | 4 (21/81) | 4 (19/81) |         |         |               | 4 (22/90)               | 4 (27/90) |         |         |               |
|            | 5 (11/81)               | 5 (9 /81) | 5 (13/81) |         |         |               | 5 (14/90)               | 5 (9 /90) |         |         |               |

Inter- and intra- rater reliability of the HCBs grade evaluation. Rater A, B, C represent three radio-neurologists. Rating 1 and 2 represented that radio-neurologists evaluated an image twice.
